# Supplementary material for: Older Women in Australia: Facing the Challenges of Dual Sensory Loss
Source: Int J Environ Res Public Health. 2019 Dec 30;17(1):263. doi: 10.3390/ijerph17010263 (PMC6981467; doi:10.3390/ijerph17010263)
Supplement: Supplementary file 1 [file ijerph-17-00263-s001.pdf]

Table S1. Prevalence of Sensory Loss by age group for women and men in all waves from 1994 to 2004.

| Age        | Sensory loss            | Women<br>1994 | Women<br>1996 | Women<br>1998 | Women<br>2000 | Women<br>2002 | Women<br>2004 |
|------------|-------------------------|---------------|---------------|---------------|---------------|---------------|---------------|
| All 65+    | Good vision and hearing | 295 55.9      | 244 57.0      | 198 56.4      | 163 56.6      | 99 46.3       | 82 49.7       |
| All 65+    | Poor vision only        | 94 17.8       | 53 12.4       | 37 10.5       | 32 11.1       | 35 16.4       | 18 10.9       |
| All 65+    | Poor hearing only       | 80 15.2       | 75 17.5       | 67 19.1       | 50 17.4       | 48 22.4       | 34 20.6       |
| All 65+    | Dual sensory loss       | 59 11.2       | 56 13.1       | 49 14.0       | 43 14.9       | 32 15.0       | 31 18.8       |
| Aged 65-74 | Good vision and hearing | 198 60.9      | 130 58.0      | 90 65.7       | 45 67.2       | 11 61.1       | NA            |
| Aged 65-74 | Poor vision only        | 48 14.8       | 34 15.2       | 15 11.0       | 7 10.5        | 2 11.1        | NA            |
| Aged 65-74 | Poor hearing only       | 47 14.5       | 34 15.2       | 23 16.8       | 11 16.4       | 2 11.1        | NA            |
| Aged 65-74 | Dual sensory loss       | 32 9.9        | 26 11.6       | 9 6.6         | 4 6.0         | 3 16.7        | NA            |
| Aged 75+   | Good vision and hearing | 97 47.8       | 114 55.9      | 108 50.5      | 118 53.4      | 88 44.9       | 82 49.7       |
| Aged 75+   | Poor vision only        | 46 22.7       | 19 9.3        | 22 10.3       | 25 11.3       | 33 16.8       | 18 10.9       |
| Aged 75+   | Poor hearing only       | 33 16.3       | 41 20.1       | 44 20.6       | 39 17.7       | 46 23.5       | 34 20.6       |
| Aged 75+   | Dual sensory loss       | 27 13.3       | 30 14.7       | 40 18.7       | 39 17.7       | 29 14.8       | 31 18.8       |
| Age        | Sensory loss            | Men<br>1994   | Men<br>1996   | Men<br>1998   | Men<br>2000   | Men<br>2002   | Men<br>2004   |
| All 65+    | Good vision and hearing | 257 55.3      | 173 47.4      | 160 53.9      | 118 47.2      | 86 48.3       | 69 46.9       |
| All 65+    | Poor vision only        | 51 11.0       | 29 8.0        | 21 7.1        | 17 6.8        | 17 9.6        | 13 8.8        |
| All 65+    | Poor hearing only       | 106 22.8      | 115 31.5      | 83 28.0       | 73 29.2       | 49 27.5       | 46 31.3       |
| All 65+    | Dual sensory loss       | 51 11.0       | 48 13.2       | 33 11.1       | 42 16.8       | 26 14.6       | 19 12.9       |
| Aged 65-74 | Good vision and hearing | 175 55.4      | 118 52.4      | 93 61.6       | 44 53.0       | 17 54.8       | NA            |
| Aged 65-74 | Poor vision only        | 33 10.4       | 13 5.8        | 10 6.6        | 5 6.0         | 3 9.7         | NA            |
| Aged 65-74 | Poor hearing only       | 72 22.8       | 71 31.6       | 38 25.2       | 23 27.7       | 8 25.8        | NA            |

|            |                         |    |      |    |      |    |      |    |      |    |      |    |      |
|------------|-------------------------|----|------|----|------|----|------|----|------|----|------|----|------|
| Aged 65-74 | Dual sensory loss       | 36 | 11.4 | 23 | 10.2 | 10 | 6.6  | 11 | 13.3 | 3  | 9.7  | NA |      |
| Aged 75+   | Good vision and hearing | 82 | 55.0 | 55 | 39.3 | 67 | 45.9 | 74 | 44.3 | 69 | 46.9 | 69 | 46.9 |
| Aged 75+   | Poor vision only        | 18 | 12.1 | 16 | 11.4 | 11 | 7.5  | 12 | 7.2  | 14 | 9.5  | 13 | 8.8  |
| Aged 75+   | Poor hearing only       | 34 | 22.8 | 44 | 31.4 | 45 | 30.8 | 50 | 29.9 | 41 | 27.9 | 46 | 31.3 |
| Aged 75+   | Dual sensory loss       | 15 | 10.1 | 25 | 17.9 | 23 | 15.8 | 31 | 18.6 | 23 | 15.7 | 19 | 12.9 |

Data source: MELSHA survey data, no weights used.

Table S2. Persistence of DSL, hearing loss and vision loss at baseline plus 2 years, plus 6 years and plus 10 years.

| MELSHA 1994-1996               | Individual Characteristics    | Women |       | Men |       |
|--------------------------------|-------------------------------|-------|-------|-----|-------|
| Variables                      | Values                        | n     | %     | n   | %     |
| Persistent DSL (1994-1996)     | No DSL in 1994 and 1996       | 351   | 82.6% | 299 | 82.1% |
|                                | DSL in 1994 only              | 18    | 4.2%  | 18  | 4.2%  |
|                                | DSL in 1996 only              | 33    | 7.8%  | 29  | 8.0%  |
|                                | DSL in 1994 and 1996          | 23    | 5.4%  | 18  | 4.9%  |
|                                | Total                         | 425   | 100%  | 364 | 100%  |
| Persistent hearing (1994-1996) | Good hearing in 1994 and 1996 | 273   | 63.9% | 184 | 50.4% |
|                                | Poor hearing in 1994 only     | 24    | 5.6%  | 19  | 4.5%  |
|                                | Poor hearing in 1996 only     | 52    | 12.2% | 62  | 17.0% |
|                                | Poor hearing in 1994 and 1996 | 78    | 18.3% | 100 | 27.4% |
|                                | Total                         | 427   | 100%  | 365 | 100%  |
| Persistent vision (1994-1996)  | Good vision in 1994 and 1996  | 269   | 63.1% | 251 | 68.8% |
|                                | Poor vision in 1994 only      | 49    | 11.5% | 37  | 8.7%  |
|                                | Poor vision in 1996 only      | 46    | 10.8% | 37  | 10.1% |
|                                | Poor vision in 1994 and 1996  | 62    | 14.6% | 40  | 11.0% |
|                                | Total                         | 426   | 100%  | 365 | 100%  |

| MELSHA 1994-2000               |                               | Individual Characteristics |       | Women |       | Men |  |
|--------------------------------|-------------------------------|----------------------------|-------|-------|-------|-----|--|
| Variables                      | Values                        | n                          | %     | n     | %     |     |  |
| Persistent DSL (1994-2000)     | No DSL in 1994 and 2000       | 229                        | 80.4% | 191   | 76.4% |     |  |
|                                | DSL in 1994 only              | 13                         | 4.6%  | 17    | 6.8%  |     |  |
|                                | DSL in 2000 only              | 34                         | 11.9% | 32    | 12.8% |     |  |
|                                | DSL in 1994 and 2000          | 9                          | 3.2%  | 10    | 4.0%  |     |  |
|                                | Total                         | 285                        | 100%  | 250   | 100%  |     |  |
| Persistent hearing (1994-2000) | Good hearing in 1994 and 2000 | 172                        | 60.4% | 112   | 44.8% |     |  |
|                                | Poor hearing in 1994 only     | 20                         | 7.0%  | 23    | 9.2%  |     |  |
|                                | Poor hearing in 2000 only     | 48                         | 16.8% | 52    | 20.8% |     |  |
|                                | Poor hearing in 1994 and 2000 | 45                         | 15.8% | 63    | 25.2% |     |  |
|                                | Total                         | 285                        | 100%  | 250   | 100%  |     |  |
| Persistent vision (1994-2000)  | Good vision in 1994 and 2000  | 178                        | 62.2% | 163   | 65.2% |     |  |
|                                | Poor vision in 1994 only      | 34                         | 11.9% | 28    | 11.2% |     |  |
|                                | Poor vision in 2000 only      | 39                         | 13.6% | 33    | 13.2% |     |  |
|                                | Poor vision in 1994 and 2000  | 35                         | 12.2% | 26    | 10.4% |     |  |
|                                | Total                         | 286                        | 100%  | 250   | 100%  |     |  |
| MELSHA 1994-2004               |                               | Individual Characteristics |       | Women |       | Men |  |
| Variables                      | Values                        | n                          | %     | n     | %     |     |  |
| Persistent DSL (1994-2004)     | No DSL in 1994 and 2004       | 125                        | 76.7% | 118   | 80.3% |     |  |
|                                | DSL in 1994 only              | 7                          | 4.3%  | 10    | 6.8%  |     |  |
|                                | DSL in 2004 only              | 26                         | 16.0% | 14    | 9.5%  |     |  |
|                                | DSL in 1994 and 2004          | 5                          | 3.1%  | 5     | 3.4%  |     |  |
|                                | Total                         | 163                        | 100%  | 147   | 100%  |     |  |
| Persistent hearing (1994-2004) | Good hearing in 1994 and 2004 | 86                         | 52.8% | 65    | 44.2% |     |  |
|                                | Poor hearing in 1994 only     | 12                         | 7.4%  | 17    | 11.6% |     |  |
|                                | Poor hearing in 2004 only     | 41                         | 25.2% | 34    | 23.1% |     |  |
|                                | Poor hearing in 1994 and 2004 | 24                         | 14.7% | 31    | 21.1% |     |  |

|                               |                              |     |       |     |       |
|-------------------------------|------------------------------|-----|-------|-----|-------|
|                               | Total                        | 163 | 100%  | 147 | 100%  |
| Persistent vision (1994-2004) | Good vision in 1994 and 2004 | 97  | 58.8% | 99  | 67.4% |
|                               | Poor vision in 1994 only     | 19  | 11.5% | 16  | 10.9% |
|                               | Poor vision in 2004 only     | 33  | 20.0% | 19  | 12.9% |
|                               | Poor vision in 1994 and 2004 | 16  | 9.7%  | 13  | 8.8%  |
|                               | Total                        | 165 | 100%  | 147 | 100%  |

Data source: MELSHA survey data, no weights used.

Table S3 . Multivariate regression results for DSL prevalence and its associated outcomes in 1994 for women.

| Women 1994                 | DVs                                | DSL 1994 | Unmet needs for hearing aids 1994 | Poor/fair health | Depressed 1994 | Perceived inadequate social activities 1994 | Community services use 1994 | Aged in place 1994-2004 |
|----------------------------|------------------------------------|----------|-----------------------------------|------------------|----------------|---------------------------------------------|-----------------------------|-------------------------|
| Individual characteristics |                                    | Coef.    | Coef.                             | Coef.            | Coef.          | Coef.                                       | Coef.                       | Coef.                   |
| Age group                  | Aged 65-74                         |          |                                   |                  |                |                                             |                             |                         |
|                            | Aged 75+                           | 0.175    | -0.155                            | -0.186           | 0.180          | -0.103                                      | 1.013*                      | -0.432                  |
| Marital status             | Current living with partner (Ref.) |          |                                   |                  |                |                                             |                             |                         |
|                            | Previously with a partner          | -0.476   | -0.322                            | 0.151            | 0.506          | 0.420                                       | 0.956*                      | -0.370                  |
|                            | Never married                      | -1.689   | -0.648                            | 0.227            | 0.580          | 0.347                                       | 0.483                       | -1.430*                 |
| Living alone               | No (Ref.)                          |          |                                   |                  |                |                                             |                             |                         |
|                            | Yes                                | 1.243*   | 0.716*                            | -0.300           | -0.008         | -0.279                                      | -0.147                      | 0.075                   |
| Housing tenure type        | Own house (Ref.)                   |          |                                   |                  |                |                                             |                             |                         |
|                            | Paying off house                   | -0.536   | -0.559                            | -1.253           | 0.939          | 0.344                                       | 0.547                       | 0.263                   |
|                            | Public tenants                     | -0.318   | 0.113                             | 0.873*           | 0.256          | -0.199                                      | -0.299                      | -0.418                  |
|                            | Private renter                     | -0.349   | -0.016                            | 0.729            | -0.378         | 0.000                                       | -0.224                      | -2.046 *                |
|                            | Other                              | 1.123*   | 0.115                             | -2.179*          | 0.138          | -0.927                                      | -0.923                      | -0.392                  |
| Main income source         | Government benefit (Ref.)          |          |                                   |                  |                |                                             |                             |                         |
|                            | Private income                     | -1.311   | -0.078                            | -0.103           | -0.095         | 0.074                                       | -0.768                      | -0.009                  |
| Vision and                 | Good vision and hearing            |          |                                   |                  |                |                                             |                             |                         |

|          |                   |        |        |        |        |        |        |        |
|----------|-------------------|--------|--------|--------|--------|--------|--------|--------|
| hearing  | (Ref.)            |        |        |        |        |        |        |        |
|          | Poor vision only  |        |        | 1.035* | 0.762* | 0.257  | 0.353  | 0.590  |
|          | Poor hearing only |        |        | -0.229 | 0.580* | 0.799* | 0.957* | 0.132  |
|          | Dual sensory loss |        |        | 1.410* | 1.237* | 0.616* | 0.687* | -0.199 |
| Constant |                   | -2.284 | -1.433 | -1.754 | -2.299 | -1.691 | -2.849 | 0.906  |
| R-square |                   | 0.079  | 0.012  | 0.079  | 0.0547 | 0.022  | 0.1087 | 0.062  |
| Sample   |                   | 517    | 517    | 514    | 517    | 493    | 488    | 287    |

Data source: MELSHA survey data, no weights used. Note: \* indicates significance at the 10% level.

Ref.=reference group. Coef.=estimated coefficient.

Table S4 . Multivariate regression results for DSL prevalence and its associated outcomes in 1994 for men.

| Men 1994                   | DVs                                | DSL 1994 | Unmet needs for hearing aids 1994 | Self-reported poor/fair health 1994 | Depressed 1994 | Perceived inadequate social activities 1994 | Community services use 1994 | Aged in place |
|----------------------------|------------------------------------|----------|-----------------------------------|-------------------------------------|----------------|---------------------------------------------|-----------------------------|---------------|
| Individual characteristics |                                    | Coef.    | Coef.                             | Coef.                               | Coef.          | Coef.                                       | Coef.                       | Coef.         |
| Age group                  | Aged 65-74 (Ref.)                  |          |                                   |                                     |                |                                             |                             |               |
|                            | Aged 75+                           | -0.093   | -0.202                            | -0.754*                             | 0.094          | 0.193                                       | 1.314*                      | -1.431 *      |
| Gender                     | Male (Ref.)                        |          |                                   |                                     |                |                                             |                             |               |
|                            | Female                             | 0.000    | 0.000                             | 0.000                               | 0.000          | 0.000                                       | 0.000                       | 0.000         |
| Marital status             | Current living with partner (Ref.) |          |                                   |                                     |                |                                             |                             |               |
|                            | Previously with a partner          | 0.424    | -0.637                            | 1.037*                              | 0.790          | 0.709                                       | 0.723                       | -0.110        |
|                            | Never married                      | 0.201    | -0.657                            | 1.104*                              | -0.745         | 1.845*                                      | 2.080*                      | 0.530         |
| Living alone               | No (Ref.)                          |          |                                   |                                     |                |                                             |                             |               |
|                            | Yes                                | 0.325    | 0.438                             | -0.520                              | 0.423          | -0.751                                      | -0.760                      | -0.095        |
| Housing tenure type        | Own house (Ref.)                   |          |                                   |                                     |                |                                             |                             |               |
|                            | Paying off house                   | 0.863    | 0.726                             | 0.875*                              | 0.672          | 0.119                                       | 0.000                       | -0.420        |
|                            | Public tenants                     | 0.000    | -0.564                            | -0.234                              | 0.000          | -0.071                                      | 0.000                       | -0.453        |
|                            | Private renter                     | 0.000    | 1.020*                            | -0.566                              | -0.034         | -0.150                                      | 0.470                       | -0.285        |
|                            | Other                              | -0.362   | -0.770                            | 0.441                               | 0.285          | 0.864                                       | -0.870                      | -1.007        |
| Main income source         | Government benefit (Ref.)          |          |                                   |                                     |                |                                             |                             |               |
|                            | Private income                     | -0.566*  | 0.349                             | -0.376                              | 0.013          | 0.151                                       | -1.498*                     | 0.183         |
| Vision and hearing         | Good vision and hearing (Ref.)     |          |                                   |                                     |                |                                             |                             |               |
|                            | Poor vision                        |          |                                   | 0.424                               | 0.572          | 0.676*                                      | -1.328                      | -0.580        |

|                   |        |        |        |        |        |        |        |
|-------------------|--------|--------|--------|--------|--------|--------|--------|
| only              |        |        |        |        |        |        |        |
| Poor hearing only |        |        | 0.531* | 0.855* | 0.663* | 0.021  | -0.289 |
| Dual sensory loss |        |        | 0.832* | 0.528  | 1.032* | 1.265* | -0.317 |
| Constant          | -2.021 | -1.188 | -1.687 | -2.828 | -2.277 | -3.194 | 2.006  |
| R-square          | 0.0293 | 0.0218 | 0.0616 | 0.0539 | 0.056  | 0.158  | 0.097  |
| Sample            | 435    | 458    | 453    | 450    | 457    | 394    | 318    |

Data source: MELSHA survey data, no weights used. Note: \* indicates significance at the 10% level.

Ref.=reference group. Coef.=estimated coefficient.

Table S5 . Multivariate regression results for DSL prevalence and its associated outcomes in 1994 for men and women.

| Women and men 1994         |                                    | DSL 1994 | Unmet needs for hearing aids 1994 | Poor/fair health1994 | Depressed 1994 | Perceived inadequate social activities 1994 | Community services use 1994 | Aged in place 1994-2004 |
|----------------------------|------------------------------------|----------|-----------------------------------|----------------------|----------------|---------------------------------------------|-----------------------------|-------------------------|
| DVs                        |                                    |          |                                   |                      |                |                                             |                             |                         |
| Individual characteristics |                                    | Coef.    | Coef.                             | Coef.                | Coef.          | Coef.                                       | Coef.                       | Coef.                   |
| Age group                  | Aged 65-74 (Ref.)                  |          |                                   |                      |                |                                             |                             |                         |
|                            | Aged 75+                           | 0.036    | -0.180                            | -0.414*              | 0.160          | -0.014                                      | 1.059*                      | -0.899*                 |
| Gender                     | Male (Ref.)                        |          |                                   |                      |                |                                             |                             |                         |
|                            | Female                             | -0.324   | -0.267                            | -0.081               | 0.447*         | 0.190                                       | 0.752*                      | -0.591*                 |
| Marital status             | Current living with partner (Ref.) |          |                                   |                      |                |                                             |                             |                         |
|                            | Previously with a partner          | -0.032   | -0.389                            | 0.453                | 0.585*         | 0.577*                                      | 0.894*                      | -0.207                  |
|                            | Never married                      | -0.749   | -0.698                            | 0.696                | 0.223          | 1.246*                                      | 1.005*                      | -0.589                  |
| Living alone               | No (Ref.)                          |          |                                   |                      |                |                                             |                             |                         |
|                            | Yes                                | 0.827*   | 0.598*                            | -0.319               | 0.113          | -0.432                                      | -0.248                      | 0.097                   |
| Housing tenure type        | Own house (Ref.)                   |          |                                   |                      |                |                                             |                             |                         |
|                            | Paying off house                   | 0.468    | 0.268                             | 0.291                | 0.760*         | 0.237                                       | -0.188                      | -0.172                  |
|                            | Public tenants                     | -0.617   | 0.035                             | 0.586                | 0.000          | -0.125                                      | -0.527                      | -0.570                  |
|                            | Private renter                     | -0.937   | 0.474                             | 0.306                | -0.206         | -1.066*                                     | -0.101                      | -0.981*                 |
|                            | Other                              | 0.723    | -0.080                            | -0.904               | 0.191          | -0.353                                      | -0.796                      | -0.470                  |

|                    |                                |         |        |          |          |        |         |        |
|--------------------|--------------------------------|---------|--------|----------|----------|--------|---------|--------|
| Main income source | Government benefit (Ref.)      |         |        |          |          |        |         |        |
|                    | Private income                 | -0.868* | 0.140  | -0.226   | -0.037   | 0.117  | -0.978* | 0.117  |
| Vision and hearing | Good vision and hearing (Ref.) |         |        |          |          |        |         |        |
|                    | Poor vision only               |         |        | 0.771*   | 0.694*   | 0.392  | 0.071   | 0.247  |
|                    | Poor hearing only              |         |        | 0.196    | 0.702*   | 0.700* | 0.679*  | 0.006  |
|                    | Dual sensory loss              |         |        | 1.135*   | 0.983*   | 0.762* | 0.808*  | -0.210 |
| Constant           |                                | -1.996  | -1.145 | -1.71462 | -2.80738 | -2.059 | -3.403  | 1.611  |
| R-square           |                                | 0.0463  | 0.0105 | 0.044    | 0.064    | 0.030  | 0.133   | 0.074  |
| Sample             |                                | 975     | 975    | 967      | 975      | 969    | 911     | 605    |

Data source: MELSHA survey data, no weights used. Note: \* indicates significance at the 10% level.

Ref.=reference group. Coef.=estimated coefficient.

Table S6. Multivariate regression results for DSL incidence and its influences in 2004 for women.

| Women 2004                 | DVs                                | DSL 2004 | Unmet needs for hearing aids 2004 | Poor/fair health 2004 | Depressed 2004 | Perceived inadequate social activities 2004 | Community services use 2004 | Aged in place 1994-2010 |
|----------------------------|------------------------------------|----------|-----------------------------------|-----------------------|----------------|---------------------------------------------|-----------------------------|-------------------------|
| Individual characteristics |                                    | Coef.    | Coef.                             | Coef.                 | Coef.          | Coef.                                       | Coef.                       | Coef.                   |
| Marital status             | Current living with partner (Ref.) |          |                                   |                       |                |                                             |                             |                         |
|                            | Previously with a partner          | 1.457    | -0.529                            | -0.500                | 0.209          | 1.389*                                      | 0.425                       | 0.177                   |
|                            | Never married                      | 0.299    | -1.307                            | 0.413                 | 0.000          | 1.828                                       | 1.603                       | 0.000                   |
| Living alone               | No (Ref.)                          |          |                                   |                       |                |                                             |                             |                         |
|                            | Yes                                | -0.120   | 0.843                             | -0.043                | -0.642         | -0.686                                      | 0.653                       | 2.205                   |
| Housing tenure type        | Own house (Ref.)                   |          |                                   |                       |                |                                             |                             |                         |
|                            | Paying off house                   | 0.000    | 0.000                             |                       |                |                                             | 0.000                       | 0.000                   |
|                            | Public tenants                     | 0.000    | 0.000                             | 1.342                 | 0.401          | 1.231                                       | 0.000                       | -5.127*                 |
|                            | Private renter                     | 1.015    | 0.606                             | 0.000                 | 1.724          | -0.470                                      | 0.998                       | 0.000                   |
|                            | Other                              | 2.063*   | 1.297                             | -0.334                | -1.060         | 0.804                                       | -1.001                      | 0.000                   |
| Main income                | Government benefit (Ref.)          |          |                                   |                       |                |                                             |                             |                         |

|                    |                                |        |        |        |        |        |        |         |
|--------------------|--------------------------------|--------|--------|--------|--------|--------|--------|---------|
| source             | Private income                 | -0.162 | 0.028  | 0.997* | 0.179  | 0.661  | -0.353 | -2.694* |
| Vision and hearing | Good vision and hearing (Ref.) |        |        |        |        |        |        |         |
|                    | Poor vision only               |        |        | 0.128  | -0.311 | 1.048  | 0.192  | 0.000   |
|                    | Poor hearing only              |        |        | 0.037  | -0.010 | 1.788* | 0.845* | 0.239   |
|                    | Dual sensory loss              |        |        | 2.449* | 1.374* | 1.940* | 1.024* | -2.175  |
| Constant           |                                | -2.532 | -1.590 | -2.194 | -1.502 | -3.481 | -1.576 | 3.220   |
| R-square           |                                | 0.0899 | 0.0236 | 0.155  | 0.0608 | 0.1419 | 0.099  | 0.306   |
| Sample             |                                | 145    | 145    | 146    | 144    | 150    | 139    | 56      |

Data source: MELSHA survey data, no weights were used. Note: \* indicates significance at the 10% level.  
Ref.=reference group. Coef.=estimated coefficient.

Table S7. Multivariate regression results for DSL incidence and its influences in 2004 for men.

| Men, 2004                  | DVs                                | DSL 2004 | Unmet needs for hearing aids 2004 | Poor/fair health 2004 | Depression 2004 | Perceived inadequate social activities 2004 | Community services use 2004 | Aged in place 1994-2010 |
|----------------------------|------------------------------------|----------|-----------------------------------|-----------------------|-----------------|---------------------------------------------|-----------------------------|-------------------------|
| Individual characteristics |                                    | Coef.    | Coef.                             | Coef.                 | Coef.           | Coef.                                       | Coef.                       | Coef.                   |
| Marital status             | Current living with partner (Ref.) |          |                                   |                       |                 |                                             |                             |                         |
|                            | Previously with a partner          | 1.348    | 1.014                             | -4.260*               | 1.900           | 1.629*                                      | -1.889                      | NA                      |
|                            | Never married                      | 1.783    | 2.653*                            |                       |                 | 1.488                                       | 0.420                       | NA                      |
| Living alone               | No (Ref.)                          |          |                                   |                       |                 |                                             |                             |                         |
|                            | Yes                                | -1.376   | -2.729*                           | 2.667*                | -1.966          | -0.837                                      | 1.583                       | NA                      |
| Housing tenure type        | Own house (Ref.)                   |          |                                   |                       |                 |                                             |                             |                         |
|                            | Paying off house                   |          | 2.730*                            | 0.551                 |                 | 2.618                                       |                             | NA                      |
|                            | Public tenants                     |          |                                   |                       |                 |                                             |                             |                         |
|                            | Private renter                     |          |                                   |                       |                 |                                             |                             |                         |
|                            | Other                              | -0.287   |                                   | 0.232                 | -1.075          | -1.334                                      | 1.883*                      | 1.058                   |

| Main income source | Government benefit (Ref.)      | Private income | -0.200 | -1.240* | -0.483 | -0.727 | -0.624 | -1.442* | 0.080 |
|--------------------|--------------------------------|----------------|--------|---------|--------|--------|--------|---------|-------|
| Vision and hearing | Good vision and hearing (Ref.) |                |        |         |        |        |        |         |       |
|                    | Poor vision only               |                |        | 1.944*  | 1.180  | 1.909  | -0.897 | 1.052   | -     |
|                    | Poor hearing only              |                |        | 0.529   | 0.980  | 0.745  | 0.275  | 0.876   | -     |
|                    | Dual sensory loss              |                |        | 1.371*  | 2.889  | 0.717  | 0.896  | 0.000   |       |
| Constant           |                                |                | -1.942 | -0.745  | -1.907 | -3.112 | -2.260 | -1.217  | 2.661 |
| R-square           |                                |                | 0.025  |         |        |        |        |         |       |
| Sample             |                                |                | 1      | 0.1091  | 0.141  | 0.201  | 0.102  | 0.130   | 0.057 |
|                    |                                |                | 127    | 123     | 124    | 122    | 129    | 121     | 56    |

Data source: MELSHA survey data, no weights used. Note: \* indicates significance at the 10% level.

Ref.=reference group. Coef.=estimated coefficient.
